# Supplementary material for: Cascade reaction-based rapid and ratiometric detection of H2S/S2− in the presence of bio-thiols with live cell imaging: demasking of ESIPT approach
Source: Royal Society of Chemistry journal article supplement (doi:10.1039/c4ra12537a), 2014-01-01
Supplement: c4ra12537a1.pdf [file c4ra12537a1.pdf]

## Supporting Information

# **Cascade reaction based rapid and ratiometric detection of H<sub>2</sub>S/S<sup>2-</sup> over bio-thiols with live cell-imaging: demasking of ESIPT approach**

Shyamaprosad Goswami, Abhishek Manna, Monalisa Mondal and Debasish Sarkar

### CONTENTS

|                                                                                                    |             |
|----------------------------------------------------------------------------------------------------|-------------|
| <i>1. Calculation of the detection limit.....</i>                                                  | <i>2</i>    |
| <i>2. Calculation of rate constant.....</i>                                                        | <i>3</i>    |
| <i>3. Fluorescence responses of FBBP + interfering species + S<sup>2-</sup> .....</i>              | <i>3</i>    |
| <i>4. <sup>1</sup>H-NMR, <sup>13</sup>C-NMR and Mass spectra.....</i>                              | <i>4-7</i>  |
| <i>5. Fluorescence spectra of FBBP with different guest species .....</i>                          | <i>8-10</i> |
| <i>6. Fluorescence emission spectra of FBBP with Na<sub>2</sub>S at λ<sub>ex</sub>=405 nm.....</i> | <i>11</i>   |
| <i>7. MTT assay of the probe FBBP.....</i>                                                         | <i>12</i>   |
| <i>8. References.....</i>                                                                          | <i>12</i>   |

### 1. Calculation of the detection limit:

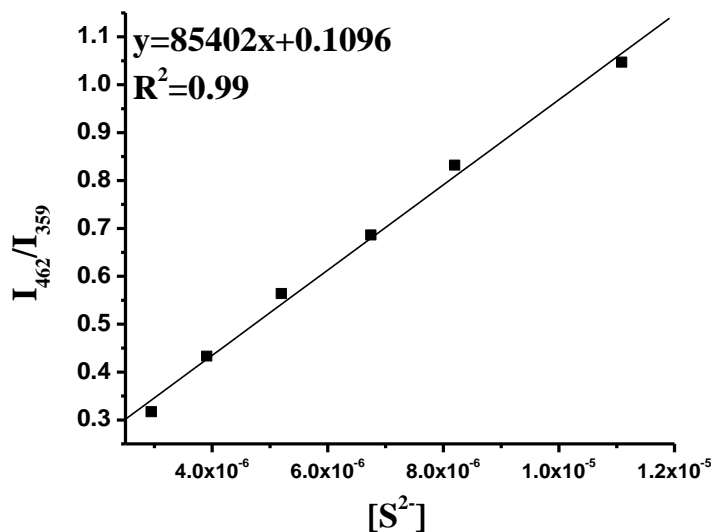

**Figure S1:** Fl. Intensity ratio ( $I_{462 \text{ nm}}/ I_{359 \text{ nm}}$ ) Vs. Conc. of  $S^{2-}$  plot.

The detection limit DL of **FBBP** for  $S^{2-}$  was determined from the following equation. [S1]

$$DL = K * Sb1/S$$

Where  $K = 2$  or  $3$  (we take  $2$  in this case);

$Sb1$  is the standard deviation and  $S$  is the slope of the calibration curve.

From the graph we get slope =  $85402$ , and  $Sb1$  value is  $0.021958$ .

Thus using the formula we get the Detection Limit =  $0.51 \mu\text{M}$  i.e. **FBBP** can detect  $S^{2-}$  in this minimum level.

## 2. Calculation of rate constant:

From Fl. Intensity ratio ( $I_{462}/I_{359}$ ) vs. time (sec.) plot using first order rate equation (Figure S2), we get rate constant  $K = \text{slope} \times 2.303 = 0.0086 \times 2.303 = 1.9 \times 10^{-2} \text{ sec}^{-1}$

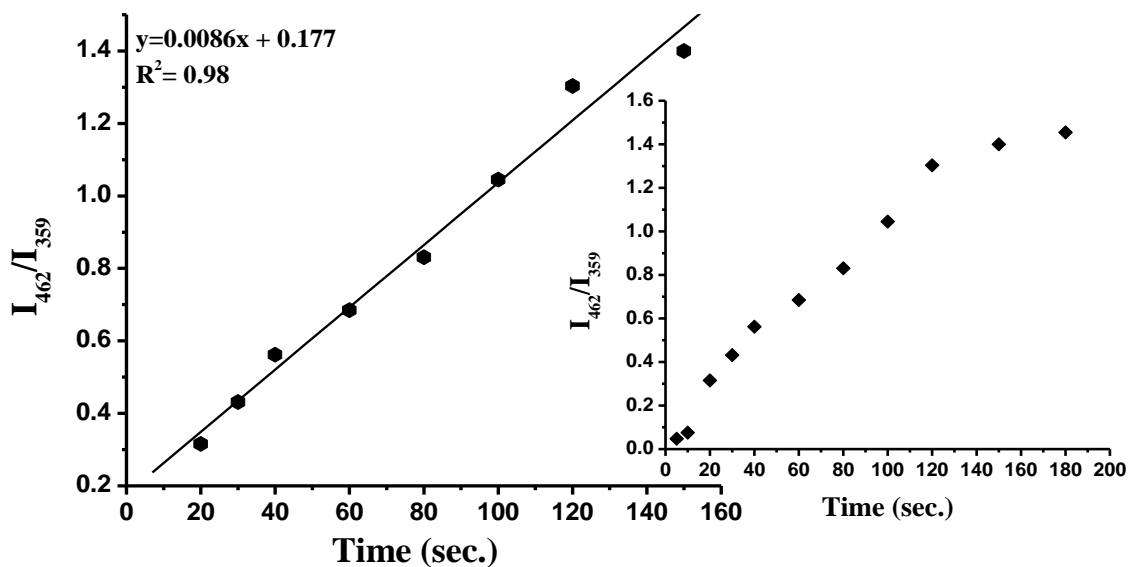

**Figure S2:** The time vs. Fl. Intensity ratio ( $I_{462 \text{ nm}}/I_{359 \text{ nm}}$ ) plot between 20 to 160 second and the full plot is in inset.

## 3. Fluorescence responses of FBBP + various species + $S^{2-}$ :

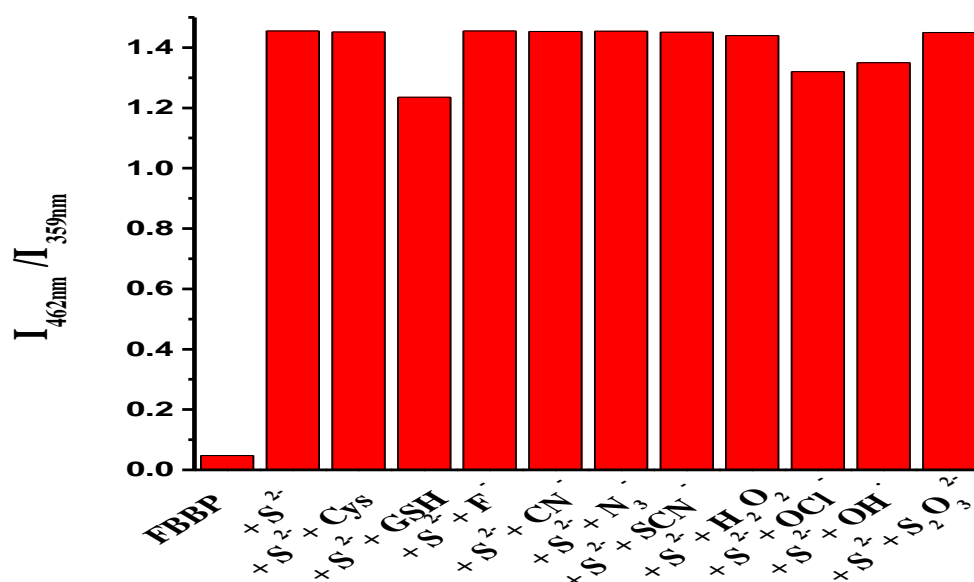

**Figure S3:** Ratiometric fluorescence responses ( $I_{462\text{nm}}/I_{359\text{nm}}$ ) of FBBP ( $c = 1.0 \times 10^{-5} \text{ M}$ ) to  $S^{2-}$  (1 equiv) containing 10 equiv of various metal species.

4.  $^1\text{H}$  NMR,  $^{13}\text{C}$  NMR and ESI MS spectra:  
 $^1\text{H}$  NMR spectrum and its expansion of Receptor i.e. FBBP in  $\text{CDCl}_3$ :

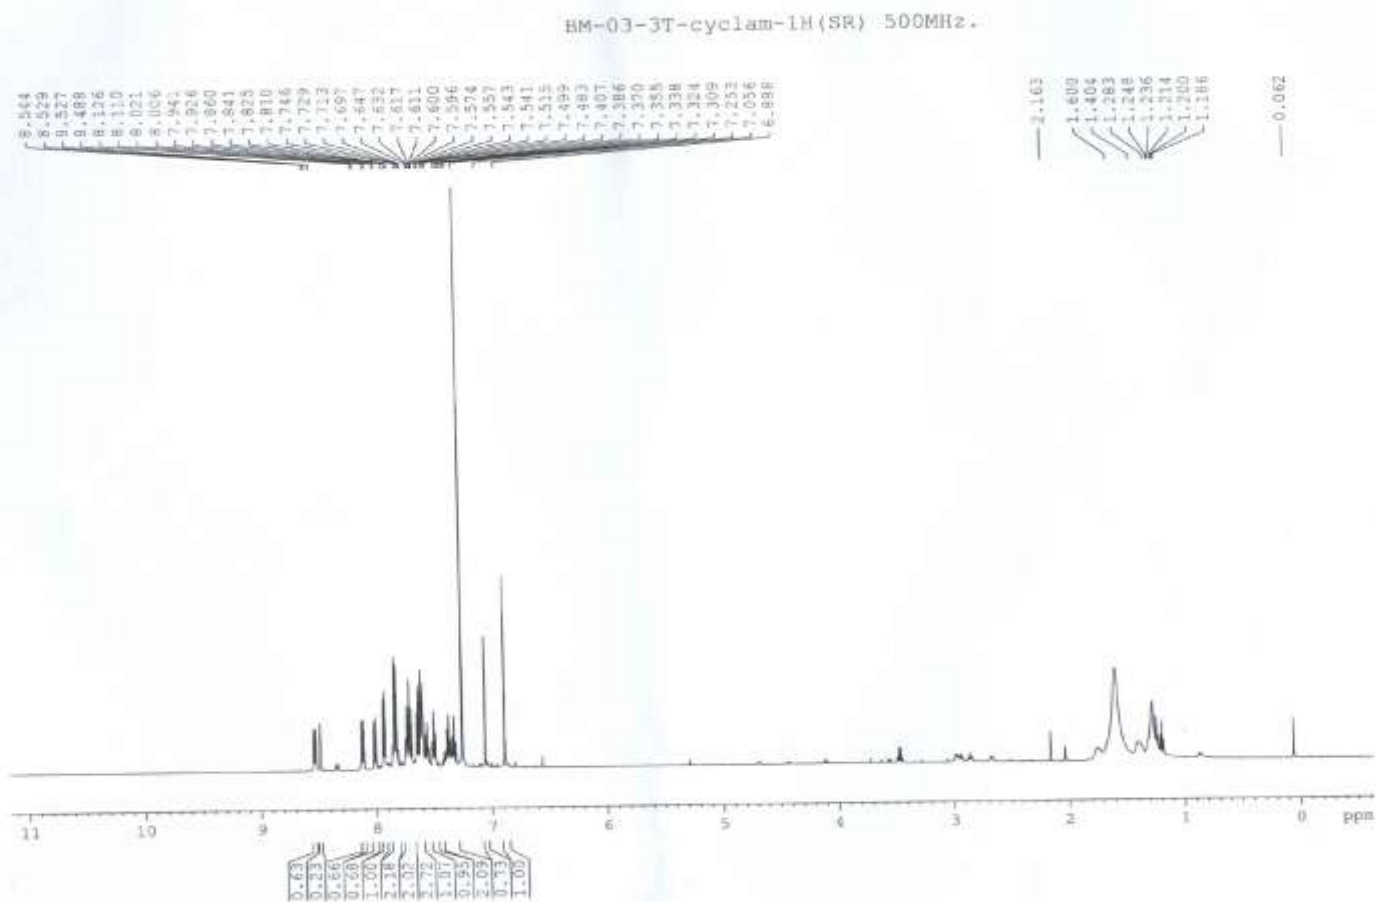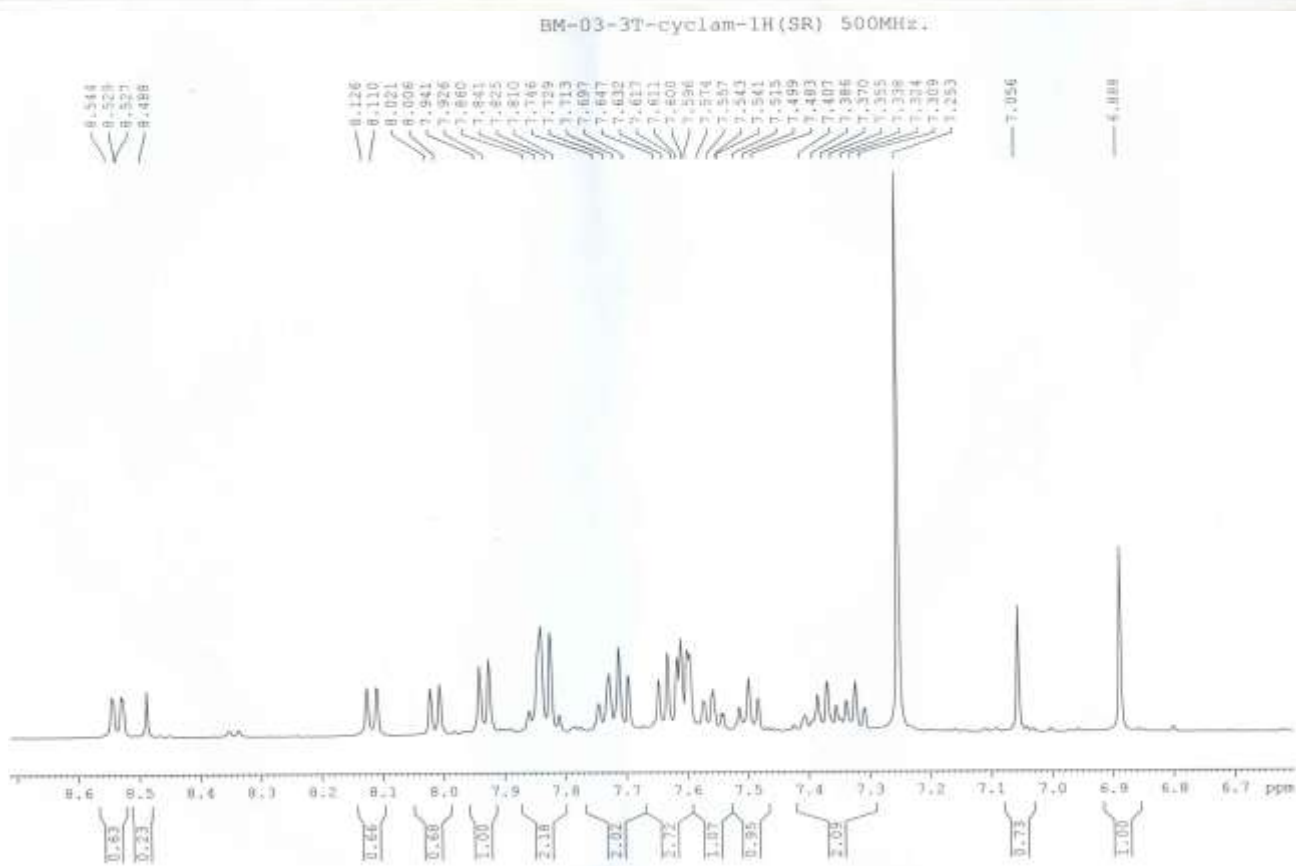

**<sup>1</sup>H NMR spectrum and its expansion of Receptor i.e. FBBP in *d*<sub>6</sub>-DMSO:**

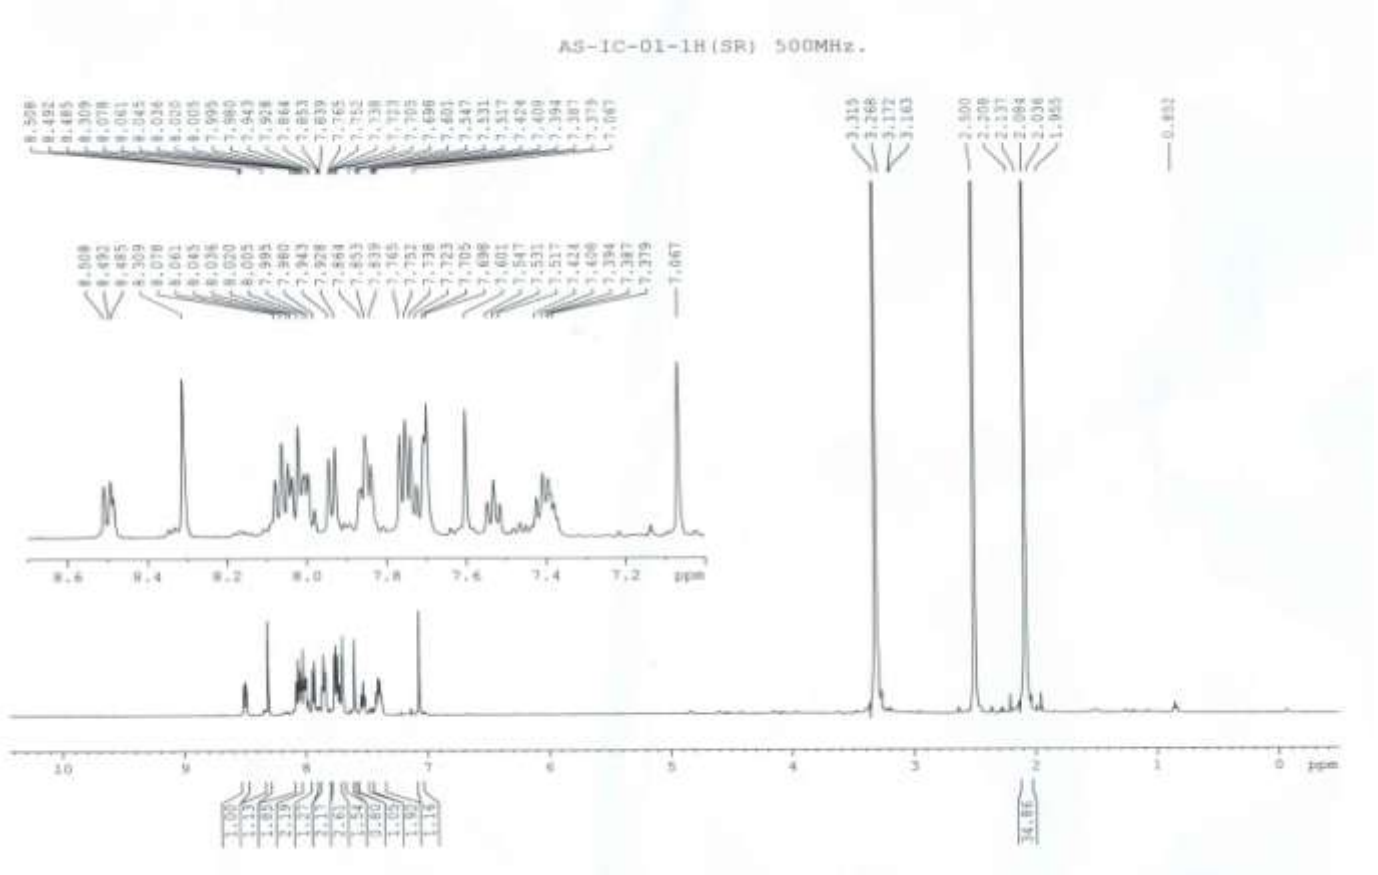

**<sup>13</sup>C NMR spectrum of Receptor i.e. FBBP:**

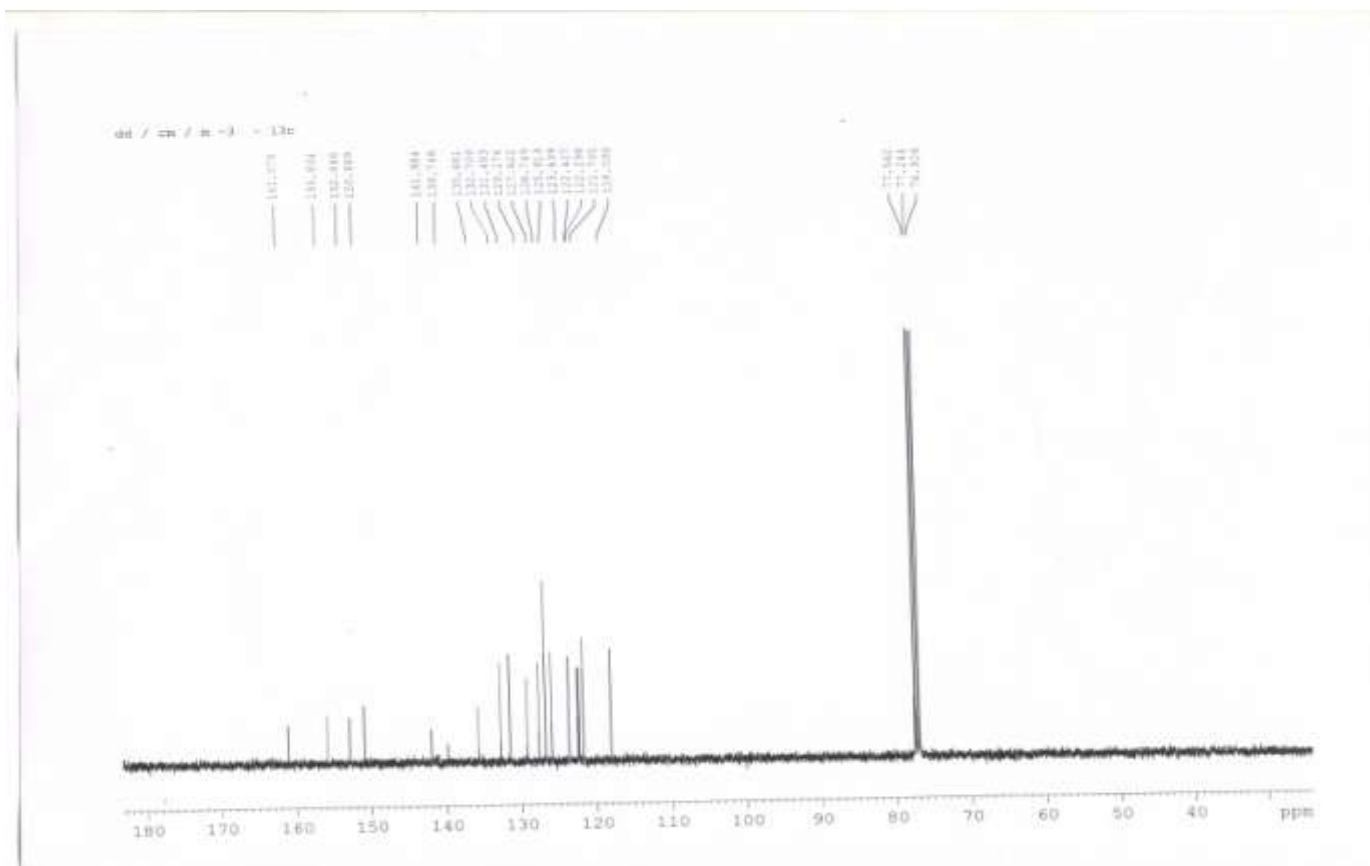

**ESI MS Mass Spectrum of FBBP:**

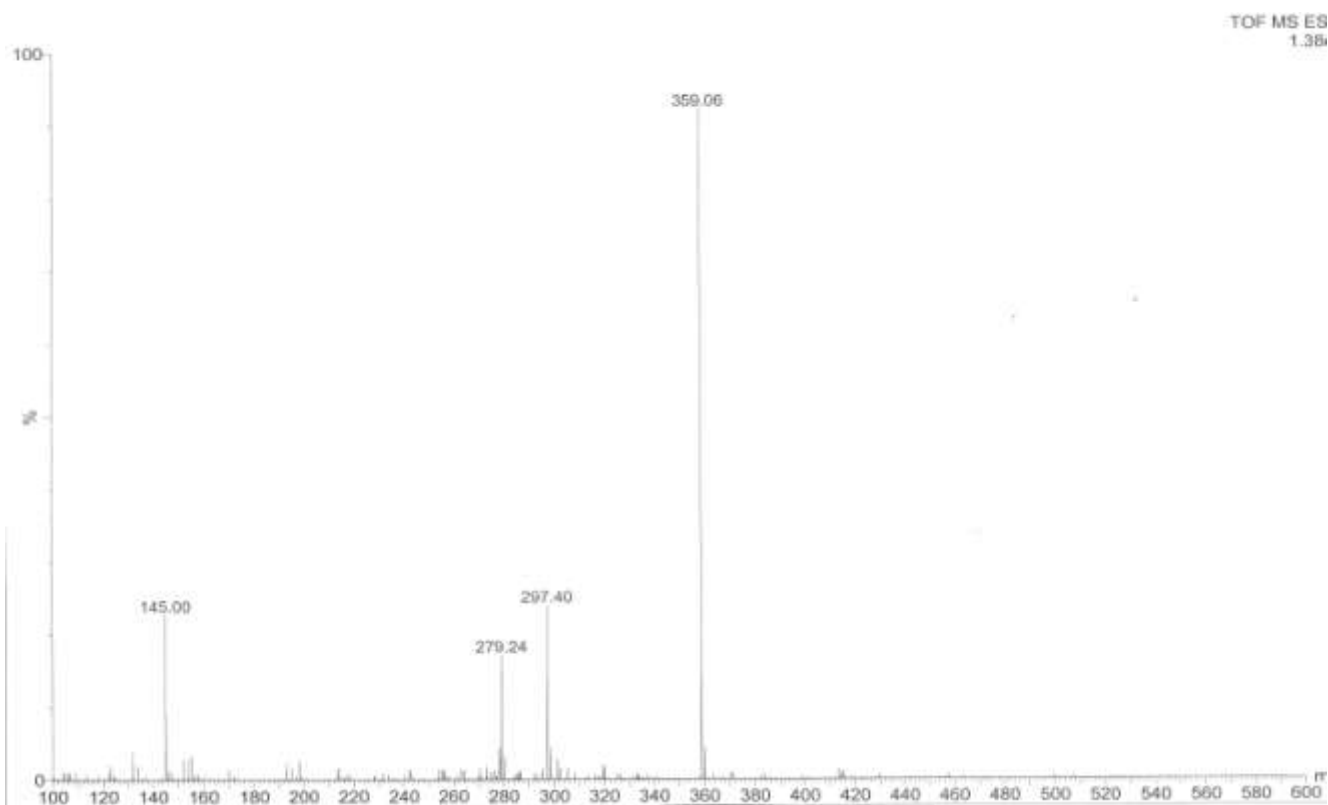

**<sup>1</sup>H NMR spectrum and its expansion of FBBP + Na<sub>2</sub>S in d<sub>6</sub>-DMSO:**

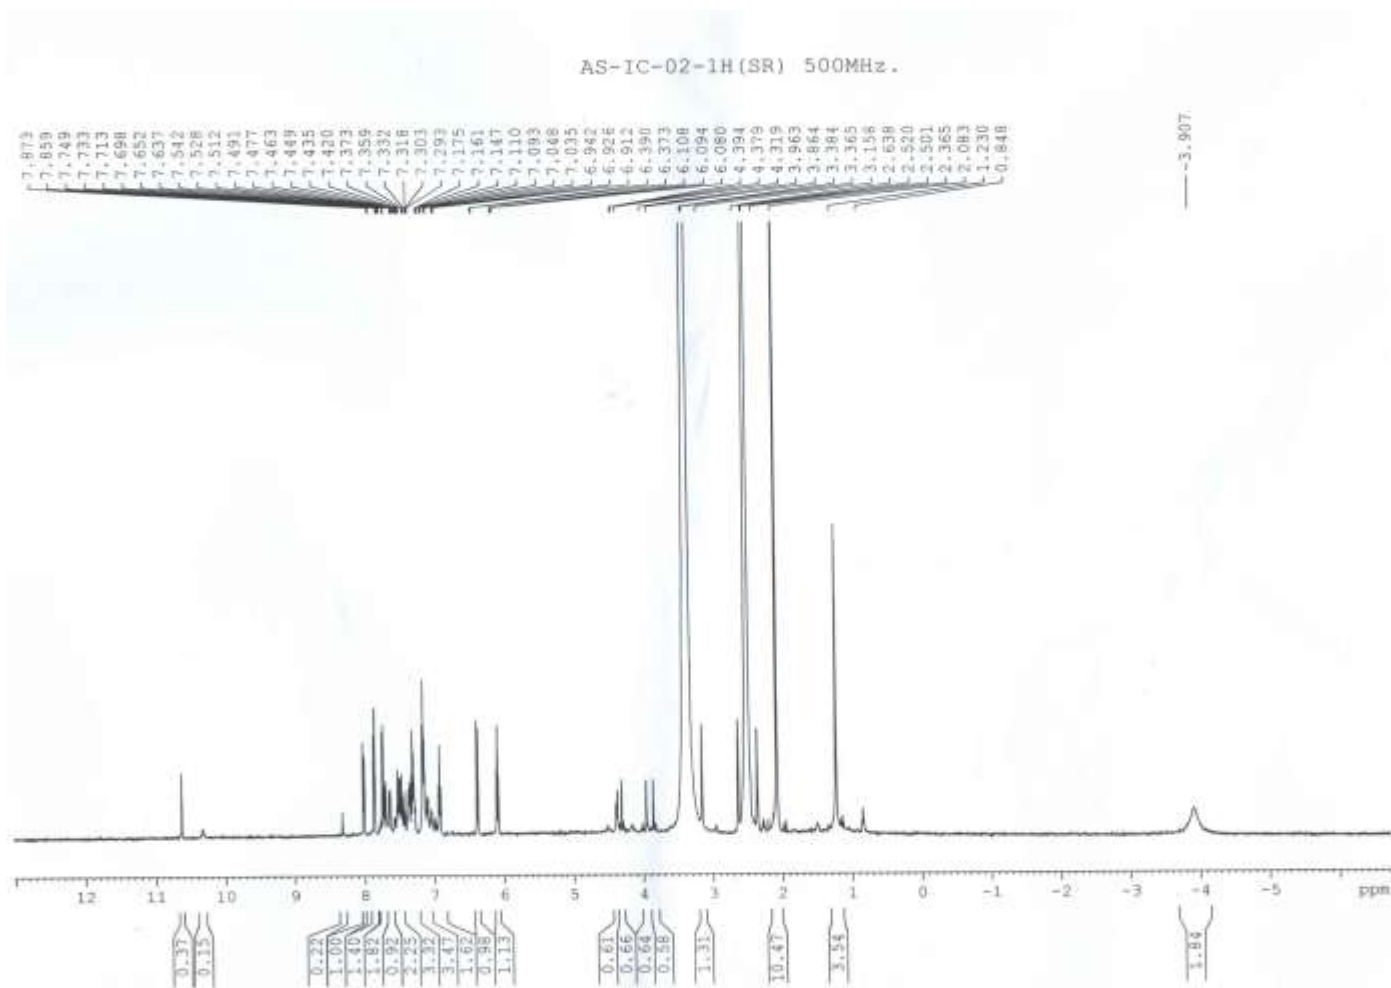

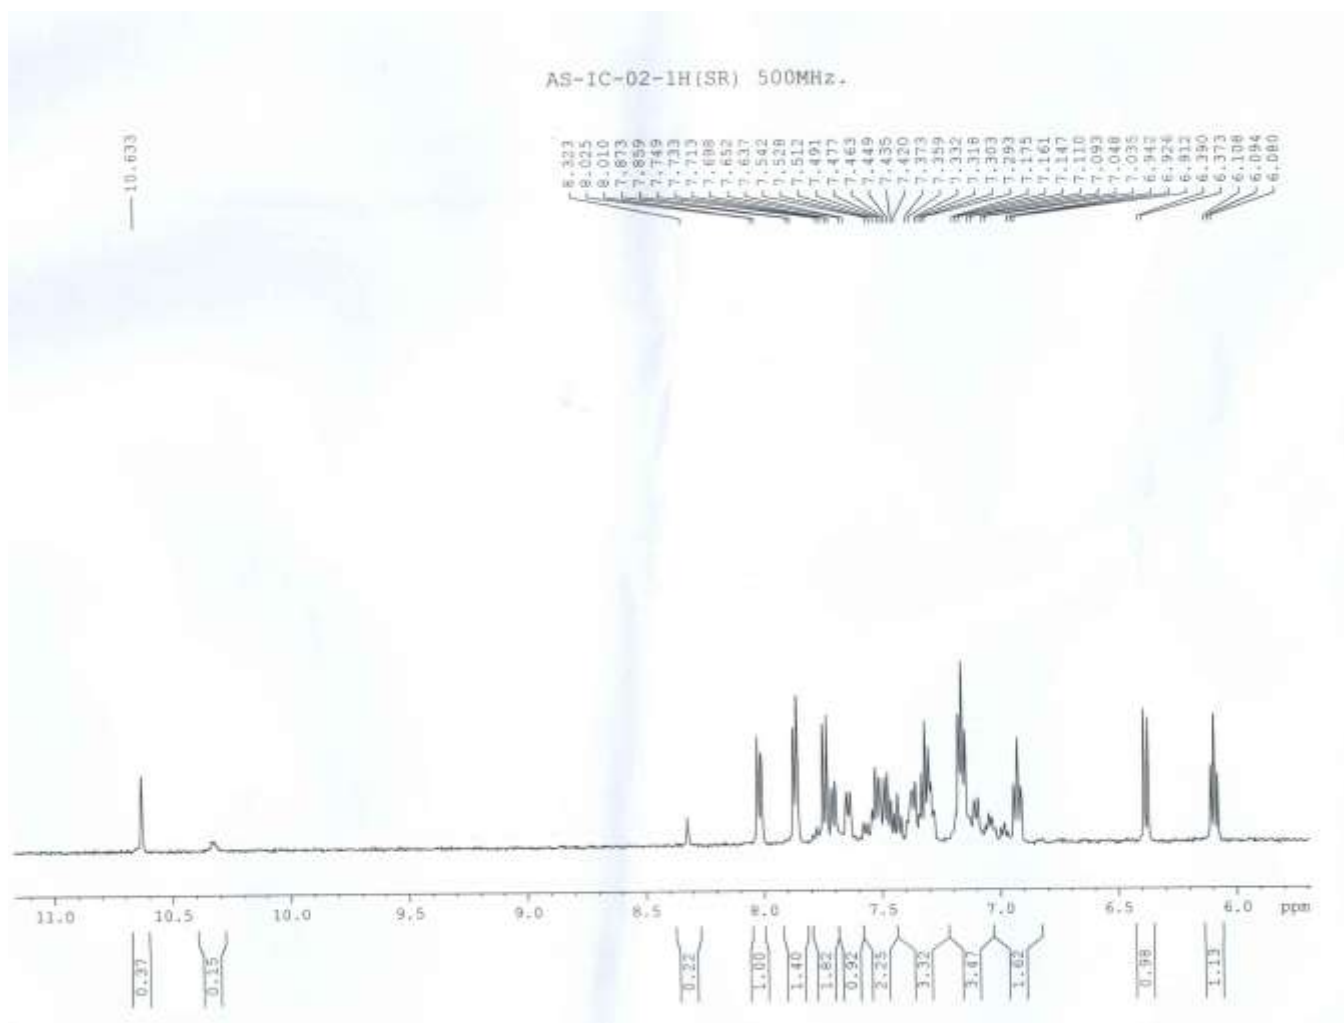

**ESI MS Spectrum of FBBP + Na<sub>2</sub>S:**

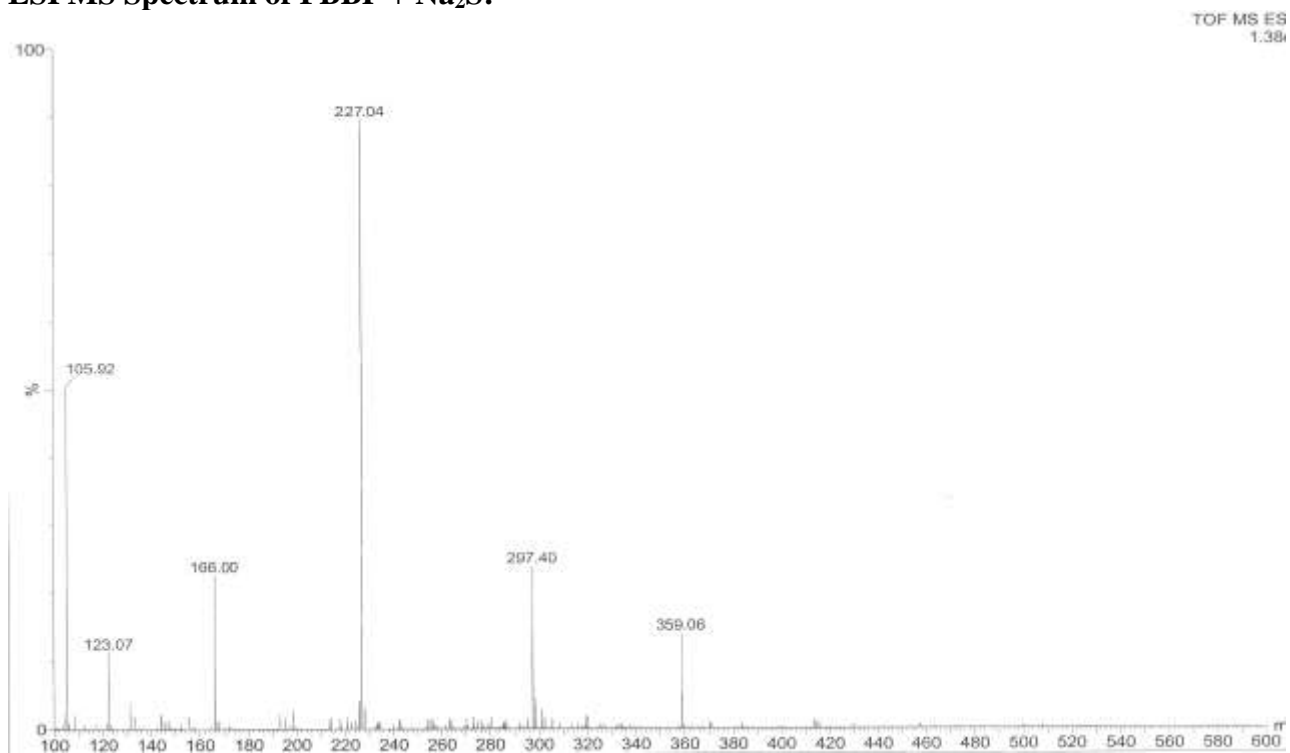

5. Fluorescence emission spectra of FBBP with different species such as Cysteine, Glutathione,  $F^-$ ,  $CN^-$ ,  $N_3^-$ ,  $SCN^-$ ,  $SO_3^{2-}$ ,  $S_2O_3^{2-}$ ,  $H_2O_2$ ,  $HSO_3^-$ , Hydroxyl radical, Hypochlorite, Ascorbic Acid,  $NH_4^+$ ,  $Co^{2+}$ ,  $Al^{3+}$ ,  $Hg^{2+}$  and  $Cu^{2+}$  in  $CH_3CN : H_2O$  (2:8, v/v) (The solutions of anions and oxidants were prepared from Cysteine, Glutathione, TBAF, KCN,  $NaN_3$ , KSCN,  $KSO_3$ ,  $K_2S_2O_3$ ,  $NaHSO_3$ ,  $H_2O_2$ , Femton's reagent,  $NaOCl$ , Ascorbic Acid,  $NH_4Cl$ ,  $CoCl_2$ ,  $Al(NO_3)_3 \cdot 9H_2O$ ,  $HgCl_2$  and  $CuCl_2$  respectively in  $H_2O$ ).

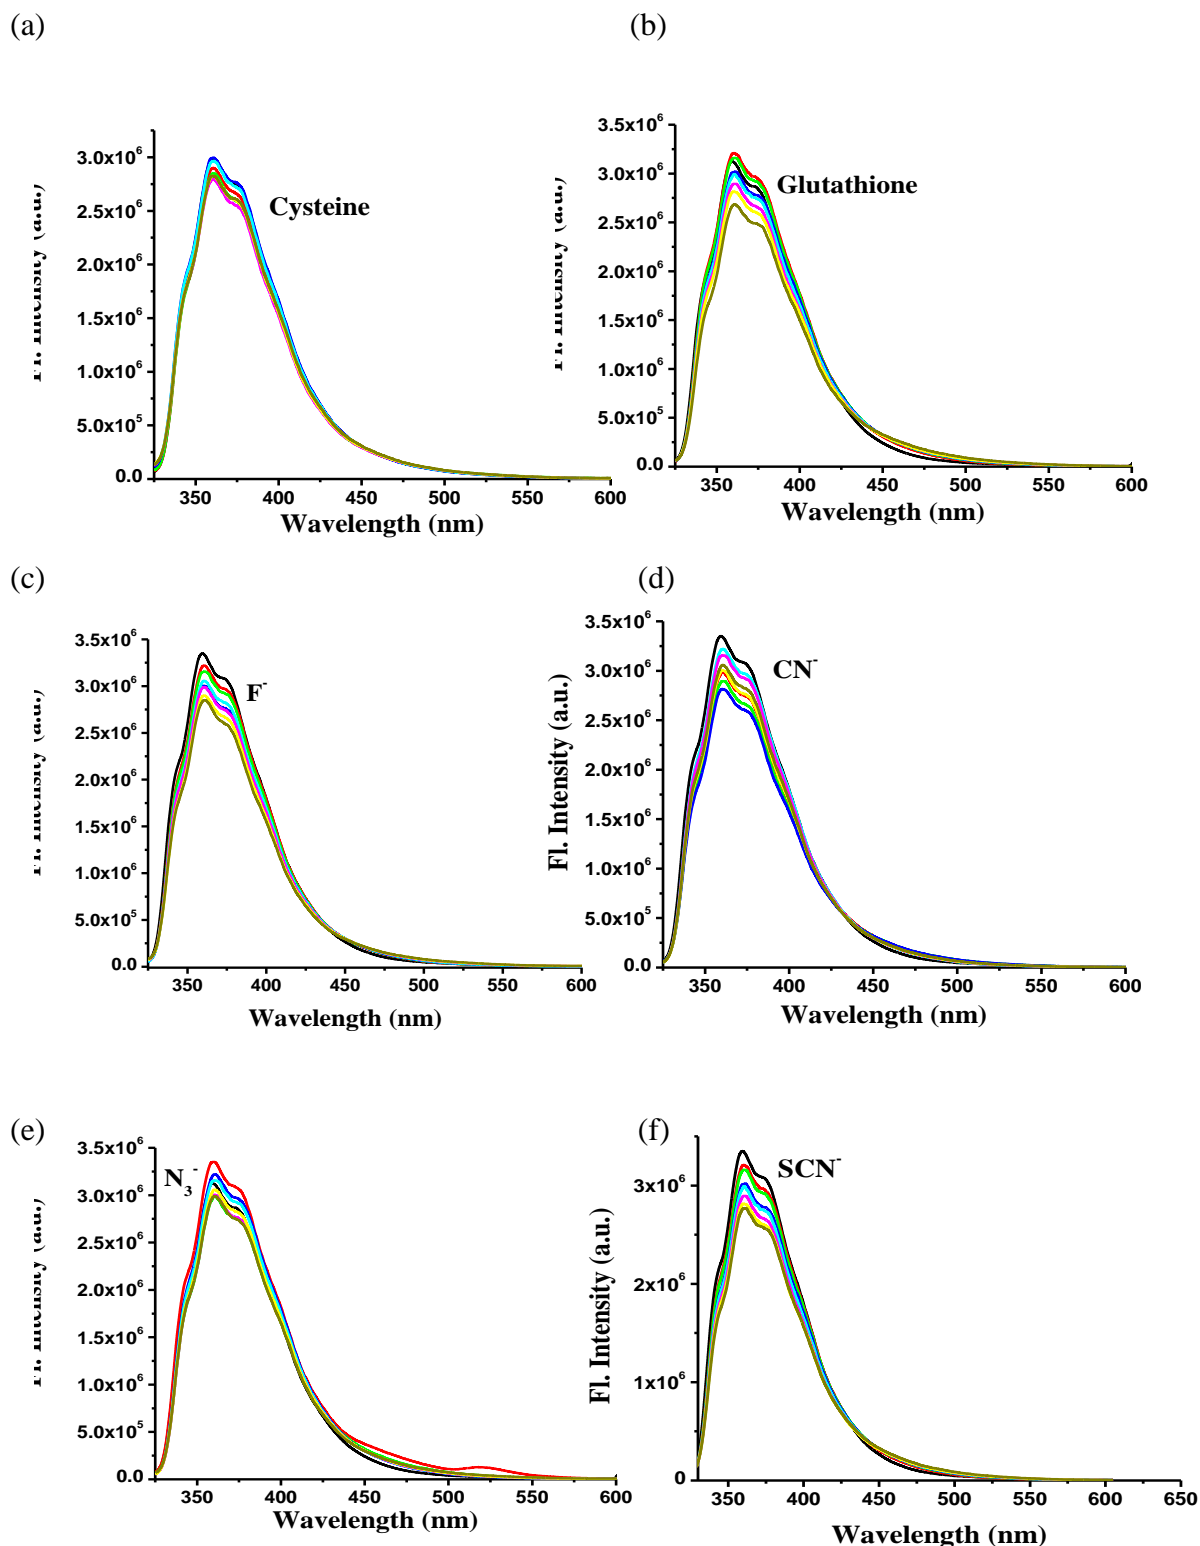



(g)

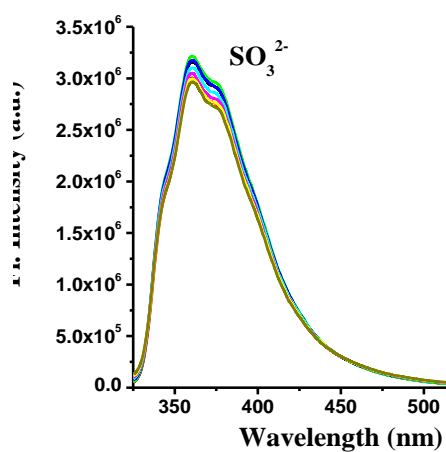

(h)

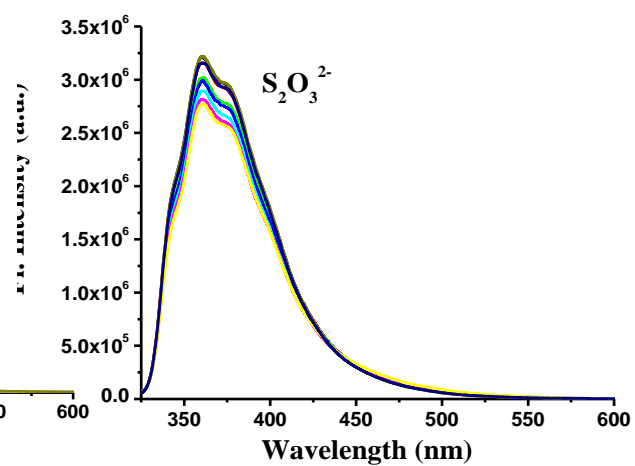

(i)

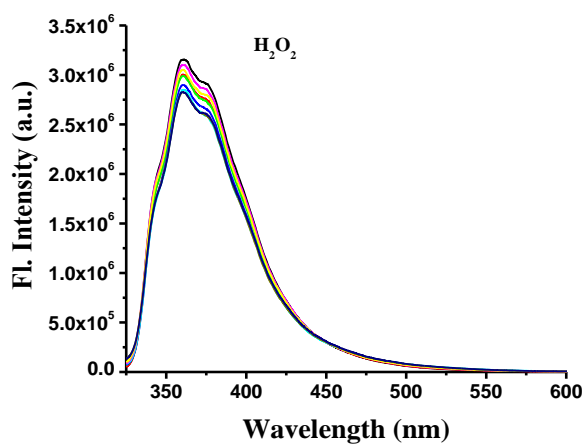

(j)

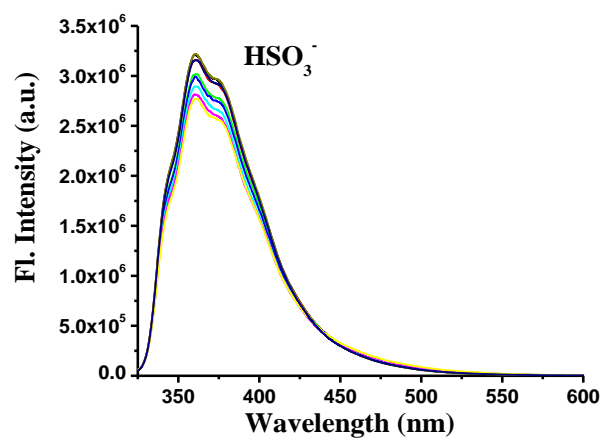

(k)

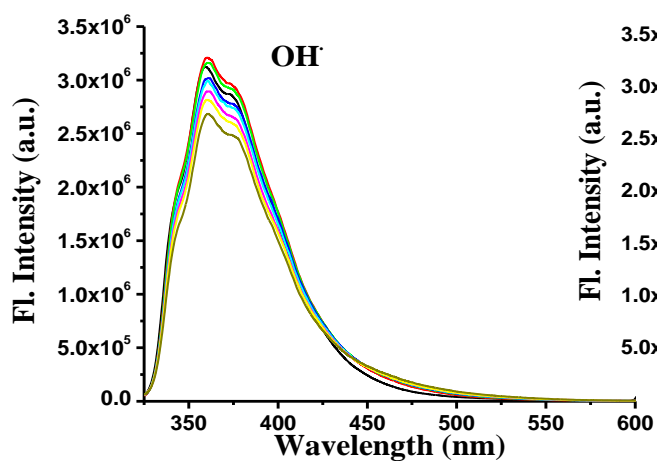

(l)

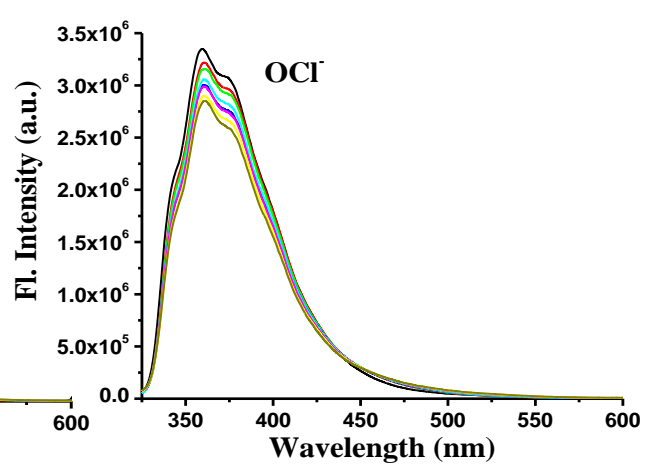

(m)

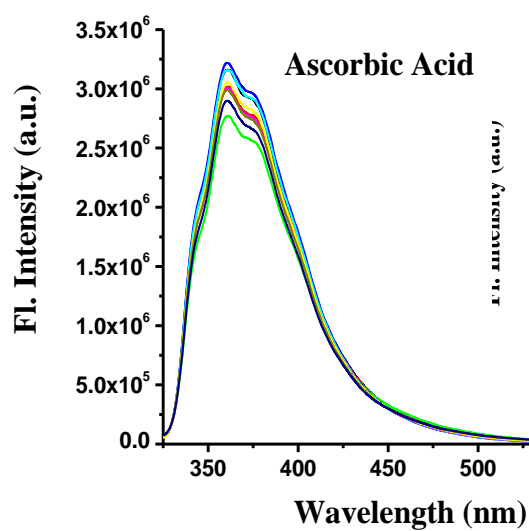

(n)

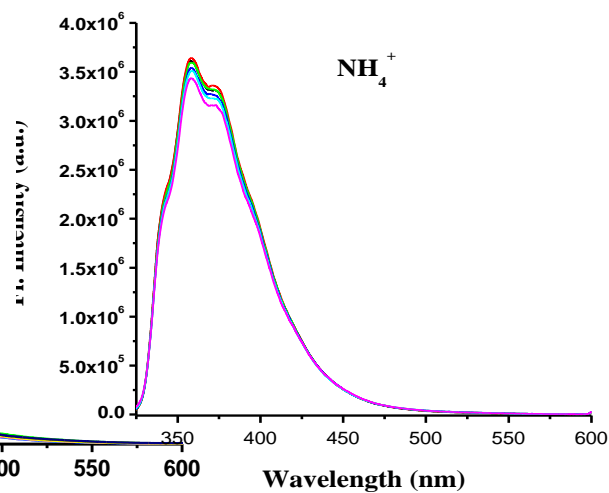

(o)

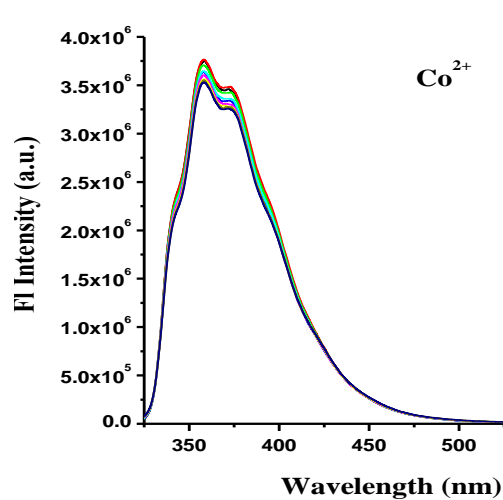

(p)

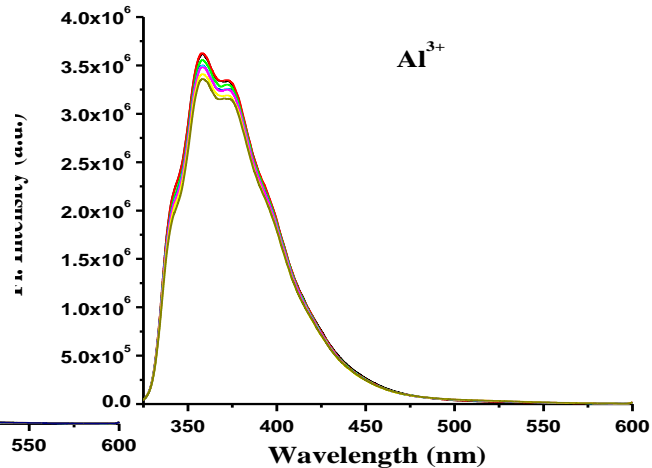

(q)

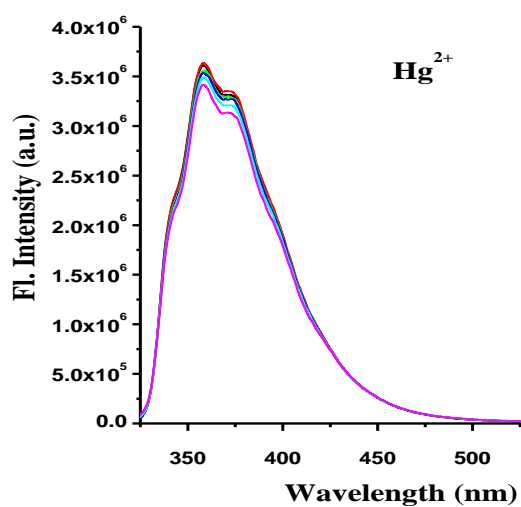

(r)

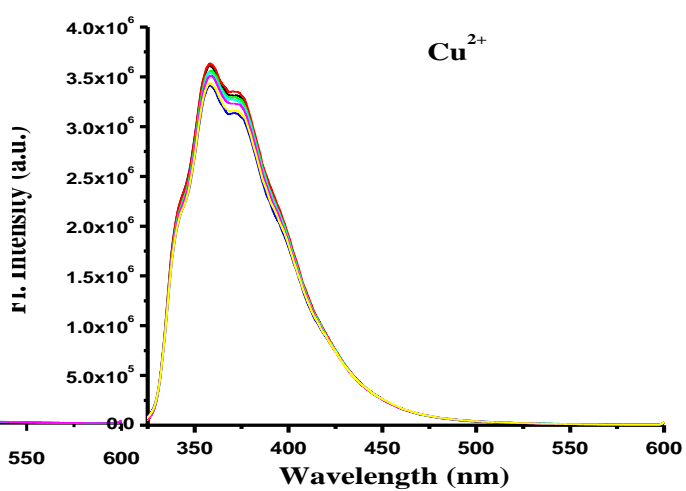

**Figure S4-S22:** Fluorescence emission spectra of FBBP with different species such as Cysteine, Glutathione, F<sup>-</sup>, CN<sup>-</sup>, N<sub>3</sub><sup>-</sup>, SCN<sup>-</sup>, SO<sub>3</sub><sup>2-</sup>, S<sub>2</sub>O<sub>3</sub><sup>2-</sup>, H<sub>2</sub>O<sub>2</sub>, HSO<sub>3</sub><sup>-</sup>, Hydroxyl radical, Hypochlorite, Ascorbic Acid, NH<sub>4</sub><sup>+</sup>, Co<sup>2+</sup>, Al<sup>3+</sup>, Hg<sup>2+</sup> and Cu<sup>2+</sup> in CH<sub>3</sub>CN : H<sub>2</sub>O (2:8, v/v) respectively.

**6. Fluorescence emission spectra of FBBP with Na<sub>2</sub>S (excitation at 405 nm):**

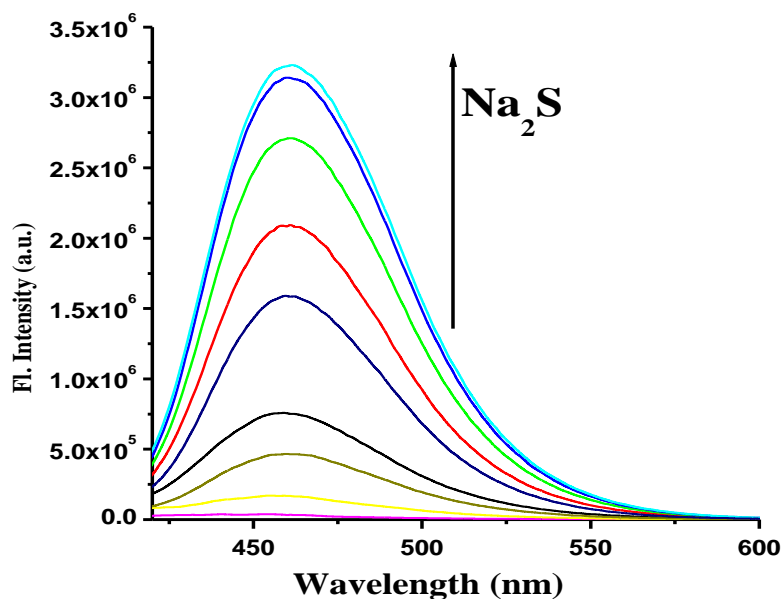

**Figure S23:** Fluorescence emission spectra of FBBP ( $c = 1.0 \times 10^{-5}$  M) with Na<sub>2</sub>S ( $c = 1.0 \times 10^{-5}$  M) at pH 7.5 in CH<sub>3</sub>CN: H<sub>2</sub>O (2:8, v/v) (excitation at 405 nm).

## 7. MTT assay of the probe FBBP:

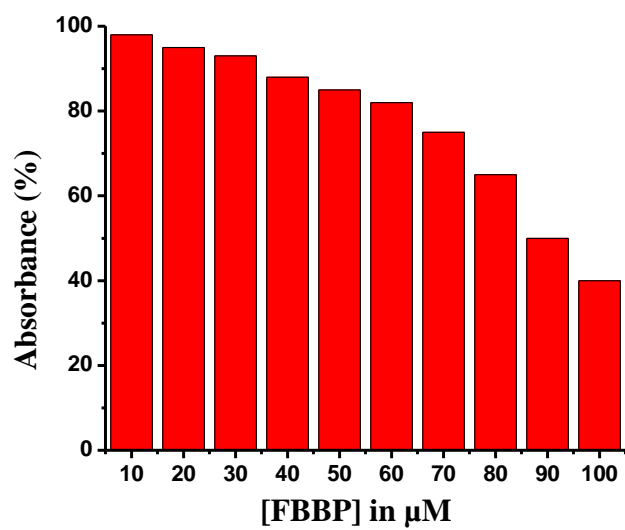

**Figure S24:** MTT assay with different concentration of probe (FBBP) after 24h.

## 8. References:

[S1] M. Zhu, M. Yuan, X. Liu, J. Xu, J. Lv, C. Huang, H. Liu, Y. Li, S. Wang, D. Zhu, *Org. Lett.* 2008, **10**, 1481-1484.
